# Supplementary material for: Discovery of a Potential HER2 Inhibitor from Natural Products for the Treatment of HER2-Positive Breast Cancer
Source: Int J Mol Sci. 2016 Jul 1;17(7):1055. doi: 10.3390/ijms17071055 (PMC4964431; doi:10.3390/ijms17071055)
Supplement: Supplementary file 1 [file ijms-17-01055-s001.xlsx]

## Sheet: Sheet1
ZINC ID	Popular Name	SMILES
31166919	4-hydroxy-3-[(2E,4R)-4-hydroxy-3,7-dimethyl-octa-2,6-dienyl]-5-[(E)-4-hydroxy-3-methyl-but-2-enyl]be	CC(=CC[C@H](/C(=C/Cc1cc(cc(c1O)C/C=C(\C)/CO)C(=O)[O-])/C)O)C
15122021	2-(3,4-dihydroxyphenyl)-6-[(2E)-3,7-dimethylocta-2,6-dienyl]-5,7-dihydroxy-2,3-dihydrochromen-4-one	CC(=CCC/C(=C/Cc1c(cc2c(c1O)C(=O)C[C@@H](O2)c3ccc(c(c3)O)O)O)/C)C
13378641	(2R,3R)-6-[(2E)-3,7-dimethylocta-2,6-dienyl]-3,5,7-trihydroxy-2-(4-hydroxyphenyl)chroman-4-one	CC(=CCC/C(=C/Cc1c(cc2c(c1O)C(=O)[C@@H]([C@H](O2)c3ccc(cc3)O)O)O)/C)C
72320250	(2R)-3-(3,4-dihydroxyphenyl)-2-[(E)-3-[4-hydroxy-3-[(2S,3R,4S,5S,6R)-3,4,5-trihydroxy-6-(hydroxymeth	c1cc(c(cc1C[C@H](C(=O)[O-])OC(=O)/C=C/c2ccc(c(c2)O[C@H]3[C@@H]([C@H]([C@@H]([C@H](O3)CO)O)O)O)O)O)O
49181256	4-hydroxy-3-[(E,3S)-7-hydroxy-3,7-dimethyl-4-oxo-oct-5-enyl]-5-[(E)-4-hydroxy-3-methyl-but-2-enyl]be	C[C@@H](CCc1cc(cc(c1O)C/C=C(\C)/CO)C(=O)[O-])C(=O)/C=C/C(C)(C)O
35456612	BRD-A48633607-001-01-4	COc1cc(cc2c1oc(c2)c3ccc4c(c3)OCO4)[C@H](CCO[C@@H]5[C@@H]([C@@H]([C@@H]([C@@H](O5)CO)O)O)O)O
72320169	3-(1,3-benzodioxol-5-yl)-7-[(2S,3R,4S,5S,6R)-6-[[(2S,3R,4R)-3,4-dihydroxy-4-(hydroxymethyl)tetrahydr	COc1cc2c(cc1O[C@H]3[C@@H]([C@H]([C@@H]([C@H](O3)CO[C@@H]4[C@@H]([C@](CO4)(CO)O)O)O)O)O)occ(c2=O)c5ccc6c(c5)OCO6
01550477	Lapatinib	CS(=O)(=O)CC[NH2+]Cc1ccc(o1)c2ccc3c(c2)c(ncn3)Nc4ccc(c(c4)Cl)OCc5cccc(c5)F
35456515	3-[3-[(2S,3R,4S,5R)-3,4-dihydroxy-5-(6-hydroxypurin-9-yl)tetrahydrofuran-2-yl]propanoyl]benzoic	c1cc(cc(c1)C(=O)[O-])C(=O)CC[C@H]2[C@@H]([C@@H]([C@@H](O2)n3cnc4c3nc[nH]c4=O)O)O
35456607	BRD-A48633607-001-01-4	COc1cc(cc2c1oc(c2)c3ccc4c(c3)OCO4)[C@@H](CCO[C@@H]5[C@@H]([C@@H]([C@@H]([C@@H](O5)CO)O)O)O)O
72320025	[(2R,3S,4S,5R,6S)-6-[2-[[(1S,6R)-1,6-dihydroxycyclohex-2-ene-1-carbonyl]oxymethyl]phenoxy]-3,4,5-tri	c1ccc(cc1)C(=O)OC[C@@H]2[C@H]([C@@H]([C@H]([C@@H](O2)Oc3ccccc3COC(=O)[C@@]4(C=CCC[C@H]4O)O)O)O)O
67912776	[(2R,3R,4S,5S,6S)-6-[2-(3,4-dihydroxyphenyl)-8-hydroxy-4-oxo-chromen-7-yl]oxy-3,4,5-trihydroxy-tetra	c1cc(ccc1/C=C/C(=O)OC[C@@H]2[C@@H]([C@@H]([C@@H]([C@@H](O2)Oc3ccc4c(=O)cc(oc4c3O)c5ccc(c(c5)O)O)O)O)O)O
44352487	4,2',3',4'-Tetrahydroxychalcone 4'-O-(6''-O-p-coumaroyl)glucoside	c1cc(ccc1/C=C/C(=O)c2ccc(c(c2O)O)O[C@H]3[C@@H]([C@H]([C@@H]([C@H](O3)COC(=O)/C=C/c4ccc(cc4)O)O)O)O)O
18456332	Adenosine triphosphate, ATP	c1nc(c2c(n1)n(cn2)[C@H]3[C@@H]([C@@H]([C@H](O3)CO[P@@](=O)([O-])O[P@@](=O)([O-])OP(=O)([O-])[O-])O)O)N
